# Supplementary material for: MicroRNA-3127 promotes cell proliferation and tumorigenicity in hepatocellular carcinoma by disrupting of PI3K/AKT negative regulation
Source: PubMed Central journal article supplement (PMC4467442; doi:10.18632/oncotarget.3438), 2015-01-31
Supplement: oncotarget-06-6359-s001.pdf [file oncotarget-06-6359-s001.pdf]

**MicorRNA-3127 promotes cell proliferation and tumorigenicity in hepatocellular carcinoma by disrupting of PI3K/AKT negative regulation**

**Supplementary Materials and Methods**

**Supplementary Table 1: A list of primers used in the reactions for real-time RT-PCR.**

| <b>Real-time PCR primer:</b> |                       |
|------------------------------|-----------------------|
| PHLPP1-up                    | CCTGCCCGCTTATTTTGTA   |
| PHLPP1-dn                    | GGTTGTGTTGCACATCCAAG  |
| PHLPP2-up                    | CTGCCAGACACCCTCTTCTC  |
| PHLPP2-dn                    | AGCAGCTGCAGCATACTCAA  |
| INPP4A -up                   | GCAGTGAGCTGCATACTCCA  |
| INPP4A -dn                   | TGGTCCCTCAATGATCTCC   |
| INPP5J -up                   | CATTCTGCCTCAATCTTTTGC |
| INPP5J -dn                   | GACCCAGTTGTCCACCC     |
| cyclin D1 (CCND1)-up         | GCCCTCGGTGTCCTACTTC   |
| cyclin D1(CCND1)-dn          | CTCCTCCTCGCACTTCTGTT  |
| p21(CDKN1A)-up               | AGGGGACAGCAGAGGAAGAC  |
| p21(CDKN1A)-dn               | GGCGTTTGGAGTGGTAGAAA  |
| p27(CDKN1B)-up               | GCAAAAATCCGAGGTGCTT   |
| p27(CDKN1B)-dn               | TTTACACAGCCCGAAGTGAA  |
| GAPDH-up                     | GCACCGTCAAGGCTGAGAAC  |
| GAPDH-dn                     | TGGTGAAGACGCCAGTGGA   |

**Supplementary Table 2: A list of primers used in the reactions for clone PCR.**

| <b>Used for subcloning and plasmid construction:</b> |                                                |
|------------------------------------------------------|------------------------------------------------|
| pMSCV-miR-3127-up                                    | GCCAGATCTATGACTAGGCACTATGGCTTATA<br>CC         |
| pMSCV-miR-3127-dn                                    | GCCGAATTGCTTCTGACTGGTTGGATAACAAG               |
| pGL3- PHLPP1-up                                      | GCCCCGCGGGCCGAGCTGTTAACAATAAACT<br>A           |
| pGL3- PHLPP1-dn                                      | GCCCTGCAGTACTTGTAATACTTGTAATTTCAT<br>TATTTATTG |
| pGL3-PHLPP2-up                                       | GCCCCGCGGCTCTACGAGAATACAGCCTATCAA<br>A         |
| pGL3- PHLPP2-dn                                      | GCCCTGCAGGGTTGAACATTAGACATCCATTAG<br>AG        |
| pGL3- INPP4A -up                                     | GCCCCGCGGAAGGTTTCAGGTTTCAGTATTCTCT<br>C        |
| pGL3- INPP4A -dn                                     | GCCCTGCAGTCCAATGAAGTCACAAACATAGA<br>AA         |
| pGL3- INPP5J -up                                     | GCCCCGCGGAGACGCCAACGAGAGAGGC                   |
| pGL3- INPP5J -dn                                     | GCCCTGCAGTTTTTCCTTGGTGCCTCCG                   |

**Supplementary Table 3: The relationship between miR-3127 and clinical pathological characteristics in 80 patients with HCC.**

| Parameters             | Number of cases | miR-3127 expression |     | <i>P</i> values |
|------------------------|-----------------|---------------------|-----|-----------------|
|                        |                 | High                | Low |                 |
| Sex                    |                 |                     |     |                 |
| Male                   | 47              | 25                  | 22  | 0.496           |
| Female                 | 33              | 15                  | 18  |                 |
| Age (years)            |                 |                     |     |                 |
| <60                    | 41              | 22                  | 19  | 0.502           |
| ≥60                    | 39              | 18                  | 21  |                 |
| Tumor size (cm)        |                 |                     |     |                 |
| <5                     | 22              | 6                   | 16  | 0.012*          |
| ≥5                     | 58              | 34                  | 24  |                 |
| Histologic grade       |                 |                     |     |                 |
| High/moderate          | 33              | 12                  | 21  | 0.041*          |
| Poor                   | 47              | 28                  | 19  |                 |
| Tumor status           |                 |                     |     |                 |
| I - II                 | 25              | 8                   | 17  | 0.030*          |
| III - IV               | 55              | 32                  | 23  |                 |
| Lymph node status      |                 |                     |     |                 |
| Negative               | 34              | 13                  | 21  | 0.070           |
| Positive               | 46              | 27                  | 19  |                 |
| Microvascular invasion |                 |                     |     |                 |
| Negative               | 30              | 13                  | 17  | 0.063           |
| Positive               | 50              | 33                  | 17  |                 |
| Distant metastasis     |                 |                     |     |                 |
| Negative               | 43              | 18                  | 25  | 0.116           |
| Positive               | 37              | 22                  | 15  |                 |

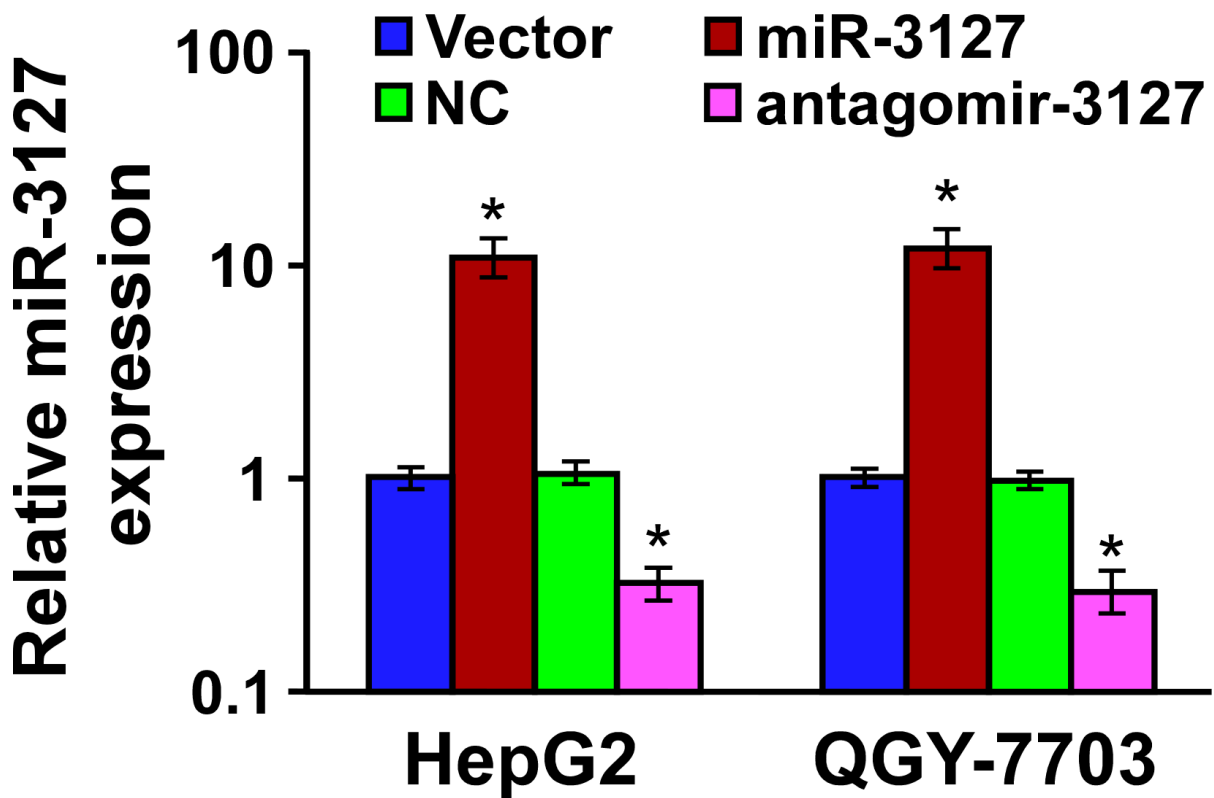

**Supplementary Figure 1:** Real-time PCR analysis of miR-3127 expression. MiR-3127 expression was examined in miR-3127–overexpressing and antagomir-3127 HepG2 and QGY-7703 cells and their respective control vectors. *U6* was used as the loading control. Bars represent the mean  $\pm$  SD of three independent experiments. \* $P < 0.05$ . NC, negative control.

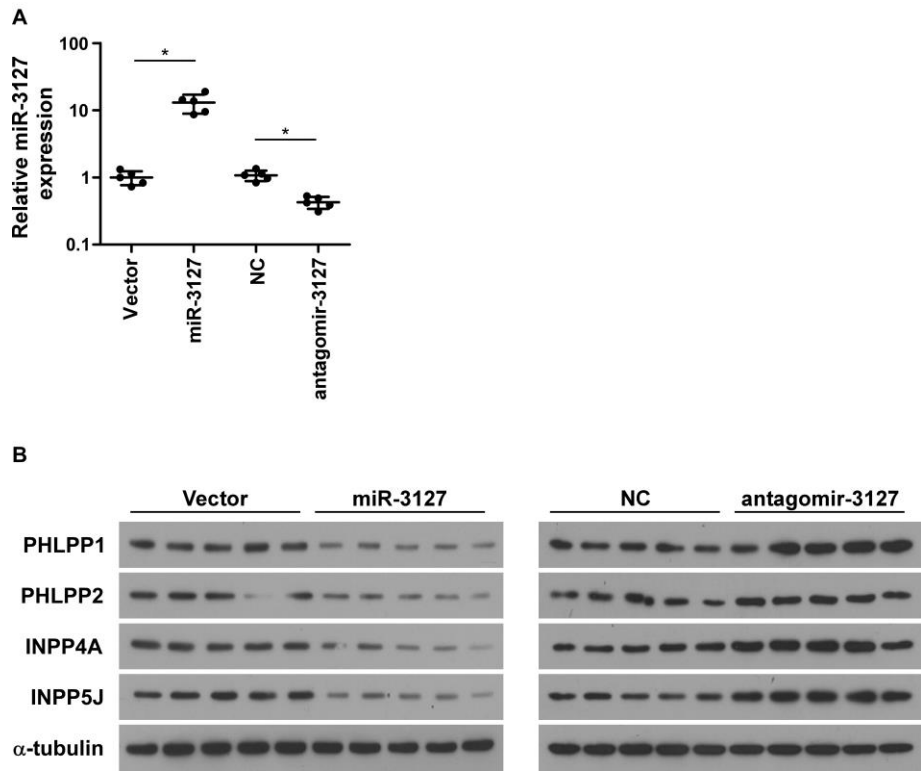

**Supplementary Figure 2:** A. Real-time PCR analysis of miR-3127 expression in xenografted tumor. B. Western blotting of PHLPP1, PHLPP2, INPP4A, and INPP5J expression in xenografted tumor.  $\alpha$ -tubulin was used as the loading control. \* $P < 0.05$ .
